# Supplementary material
Source: HighWire-hosted journal article supplement (https://www.annfammed.org/content/suppl/2022/03/23/20.2.181)
Supplement: HansmannSupp.pdf [file HansmannSupp.pdf]

## Supplemental materials for

Hansmann KJ, Alberth J, Freidel R, Jenness A. Adapting an in-clinic resource navigator program to a virtual referral model. *Ann Fam Med*. 2022;20(2):181.

**Funding support:** Dr Hansmann's work is supported by a Health Services and Resources Administration National Service Research Award (T32HP10010).

**Disclaimer:** This perspective does not necessarily reflect the views of the authors' funders.

**Prior presentations:** Preliminary data from this quality improvement project were presented as a poster: Developing a Telemedicine Workflow for Screening and Referring Patients at UW Northeast Family Medical Center to the Existing Resource Navigator Program. North American Primary Care Research Group Annual Meeting; November 20-24, 2020; virtual meeting, .

**Acknowledgements:** The authors would like to thank Lane Hanson, Jill Jacklitz, Sheray Wallace, and Kabir Bedi for the efforts and leadership in the Community Resource Navigator Program.

---

## References

1. Link BG, Phelan J. Social conditions as fundamental causes of disease. *J Health Soc Behav*. 1995;80-94. [https://core.ac.uk/reader/77145022?utm\\_source=linkout](https://core.ac.uk/reader/77145022?utm_source=linkout)
2. Gottlieb L, Cottrell EK, Park B, Clark KD, Gold R, Fichtenberg C. Advancing social prescribing with implementation science. *J Am Board Fam Med*. 2018;31(3):315-321. 10.3122/jabfm.2018.03.170249

**Supplemental Appendix Table 1. Description of Screening and Referral Workflows when CRNP was on-site (Pre-Virtual) and after CRNP began working remotely (Virtual).**

|                  | <b>Pre-Virtual Workflow</b>                                                                                                                                                                                           | <b>Virtual: Problem Identification</b>                                                                                                                                                         | <b>Virtual: Workflow Solutions</b>                                                                                                                                                                                                                                                                                                                                                                                            |
|------------------|-----------------------------------------------------------------------------------------------------------------------------------------------------------------------------------------------------------------------|------------------------------------------------------------------------------------------------------------------------------------------------------------------------------------------------|-------------------------------------------------------------------------------------------------------------------------------------------------------------------------------------------------------------------------------------------------------------------------------------------------------------------------------------------------------------------------------------------------------------------------------|
| <b>Screening</b> | <b>Paper screening questionnaire: Clinic staff provided patients with a yellow screening questionnaire (see Appendix 2) for social needs</b>                                                                          | <b>Informal Conversation: Clinic staff identify patients that might benefit from the CNRP if patients directly or indirectly refer to social needs during virtual rooming or virtual visit</b> | <b>Universal Screening Protocol: Reception staff provide all patients at office visits with a handout of the Navigators' phone number to contact</b>                                                                                                                                                                                                                                                                          |
| <b>Referral</b>  | <b>Warm handoff: Patients could stop at checkout desk to meet Navigators; clinic staff could directly introduce patients to the Navigators; patients could leave their phone number to be contacted by Navigators</b> | <b>Asynchronous handoff: Clinic staff provide the Navigators with the patient's phone numbers so they can contact patients</b>                                                                 | <p><b>Clinician/Staff Referral: All clinicians and staff have access to Navigator phone number and email through electronic health record "Smartphrase" and reminder signs on workstations in clinic</b></p> <p><b>Patient Self-Referral: Patients are provided with phone number and email to contact Navigators directly at all office visits and can be provided this information during telehealth visits as well</b></p> |

|                               |                                                                    |                                                                                         |                                                                                                                                                                                            |
|-------------------------------|--------------------------------------------------------------------|-----------------------------------------------------------------------------------------|--------------------------------------------------------------------------------------------------------------------------------------------------------------------------------------------|
| <b>Navigator Availability</b> | <b>Available to assist patients on-site during business hours.</b> | <b>Navigators work remotely. Available to answer phone calls during business hours.</b> | <b>Navigators work remotely. Available to answer phone calls during business hours. Navigator representatives join clinic huddles (conducted via telephone) weekly to provide updates.</b> |
|-------------------------------|--------------------------------------------------------------------|-----------------------------------------------------------------------------------------|--------------------------------------------------------------------------------------------------------------------------------------------------------------------------------------------|

**NOTES**

**Before the transition to the virtual workflow in March 2020, the Navigators had been averaging 15 new referrals per month. From March 2020 – to September 2020 the Navigators averaged 3 new referrals per month (during this time, Navigators continued to provide resource navigation services to patients that had previously been referred to the program, a panel of ~200 patients). From October 2020 to May 2021 the Navigators averaged 6 new referrals per month.**

**Both the pre-virtual and virtual workflows included screening materials in Spanish and our clinic’s interpreter services were available to Navigators during phone calls to patients.**
